# Supplementary material for: An unbiased silencing screen in muscle cells identifies miR-320a, miR-150, miR-196b, and miR-34c as regulators of skeletal muscle mitochondrial metabolism
Source: PubMed Central journal article supplement — Mol Metab. 2017 Aug 31;6(11):1429–42. doi: 10.1016/j.molmet.2017.08.007 (PMC5681243; doi:10.1016/j.molmet.2017.08.007), 2017-08-31
Supplement: mmc2.pdf [file mmc2.pdf]

**An unbiased silencing screen in muscle cells identifies miR-320a, miR-150, miR-196b and miR-34c as regulators of skeletal muscle mitochondrial metabolism**

Dennis Dahlmans, Alexandre Houzelle, Pénélope Andreux, Johanna A. Jorgensen, Xu Wang, Leon J. de Windt, Patrick Schrauwen, Johan Auwerx and Joris Hoeks

**Supplemental table 1 | Locked nucleic acids (LNA) library used for the primary and secondary microRNA screening in C2C12 muscle cells.**

List of all mouse microRNAs targeted by the miRCURY LNA™ microRNA Inhibitor Lib

| Product # | Probe ID | mirBase ID/mirPlus ID | miRBase accession |
|-----------|----------|-----------------------|-------------------|
|           |          | mmu-let-7a            | MIMAT0000521      |
|           |          | mmu-let-7a-1*         | MIMAT0004620      |
|           |          | mmu-let-7a-2*         | MIMAT0017015      |
|           |          | mmu-let-7b            | MIMAT0000522      |
|           |          | mmu-let-7b*           | MIMAT0004621      |
|           |          | mmu-let-7c            | MIMAT0000523      |
|           |          | mmu-let-7c-1*         | MIMAT0004622      |
|           |          | mmu-let-7c-2*         | MIMAT0005439      |
|           |          | mmu-let-7d            | MIMAT0000383      |
|           |          | mmu-let-7d*           | MIMAT0000384      |
|           |          | mmu-let-7e            | MIMAT0000524      |
|           |          | mmu-let-7e*           | MIMAT0017016      |
|           |          | mmu-let-7f            | MIMAT0000525      |
|           |          | mmu-let-7f-1*         | MIMAT0004623      |
|           |          | mmu-let-7f-2*         | MIMAT0017017      |
|           |          | mmu-let-7g            | MIMAT0000121      |
|           |          | mmu-let-7g*           | MIMAT0004519      |
|           |          | mmu-let-7i            | MIMAT0000122      |
|           |          | mmu-let-7i*           | MIMAT0004520      |
|           |          | mmu-miR-1             | MIMAT0000123      |
|           |          | mmu-miR-100           | MIMAT0000655      |
|           |          | mmu-miR-101a          | MIMAT0000133      |
|           |          | mmu-miR-101a*         | MIMAT0004526      |
|           |          | mmu-miR-101b          | MIMAT0000616      |
|           |          | mmu-miR-103           | MIMAT0000546      |
|           |          | mmu-miR-103-1*        | MIMAT0017024      |
|           |          | mmu-miR-103-2*        | MIMAT0017025      |
|           |          | mmu-miR-105           | MIMAT0004856      |
|           |          | mmu-miR-106a          | MIMAT0000385      |
|           |          | mmu-miR-106b          | MIMAT0000386      |
|           |          | mmu-miR-106b*         | MIMAT0004582      |
|           |          | mmu-miR-107           | MIMAT0000647      |
|           |          | mmu-miR-107*          | MIMAT0017048      |
|           |          | mmu-miR-10a           | MIMAT0000648      |
|           |          | mmu-miR-10a*          | MIMAT0004659      |
|           |          | mmu-miR-10b           | MIMAT0000208      |
|           |          | mmu-miR-10b*          | MIMAT0004538      |
|           |          | mmu-miR-1-1*          | MIMAT0016979      |
|           |          | mmu-miR-1186          | MIMAT0005836      |
|           |          | mmu-miR-1187          | MIMAT0005837      |
|           |          | mmu-miR-1188          | MIMAT0005843      |
|           |          | mmu-miR-1190          | MIMAT0005847      |
|           |          | mmu-miR-1191          | MIMAT0005849      |
|           |          | mmu-miR-1192          | MIMAT0005850      |
|           |          | mmu-miR-1193-3p       | MIMAT0005851      |
|           |          | mmu-miR-1194          | MIMAT0005852      |
|           |          | mmu-miR-1195          | MIMAT0005856      |
|           |          | mmu-miR-1196          | MIMAT0005857      |
|           |          | mmu-miR-1197          | MIMAT0005858      |
|           |          | mmu-miR-1198-5p       | MIMAT0005859      |
|           |          | mmu-miR-1199          | MIMAT0005860      |

|                   |              |
|-------------------|--------------|
| mmu-miR-122       | MIMAT0000246 |
| mmu-miR-1224      | MIMAT0005460 |
| mmu-miR-124       | MIMAT0000134 |
| mmu-miR-124*      | MIMAT0004527 |
| mmu-miR-1247      | MIMAT0014800 |
| mmu-miR-1247*     | MIMAT0014801 |
| mmu-miR-1249      | MIMAT0010560 |
| mmu-miR-1251      | MIMAT0014824 |
| mmu-miR-125a-3p   | MIMAT0004528 |
| mmu-miR-125a-5p   | MIMAT0000135 |
| mmu-miR-125b-1-3p | MIMAT0004669 |
| mmu-miR-125b-2-3p | MIMAT0004529 |
| mmu-miR-125b-5p   | MIMAT0000136 |
| mmu-miR-126-3p    | MIMAT0000138 |
| mmu-miR-126-5p    | MIMAT0000137 |
| mmu-miR-127       | MIMAT0000139 |
| mmu-miR-127*      | MIMAT0004530 |
| mmu-miR-1274a     | MIMAT0009445 |
| mmu-miR-128       | MIMAT0000140 |
| mmu-miR-128-1*    | MIMAT0016982 |
| mmu-miR-129-1-3p  | MIMAT0016994 |
| mmu-miR-129-2-3p  | MIMAT0000544 |
| mmu-miR-129-5p    | MIMAT0000209 |
| mmu-miR-1298      | MIMAT0014809 |
| mmu-miR-1-2-as-3p | MIMAT0017326 |
| mmu-miR-1-2-as-5p | MIMAT0005835 |
| mmu-miR-1306      | MIMAT0009411 |
| mmu-miR-130a      | MIMAT0000141 |
| mmu-miR-130a*     | MIMAT0016983 |
| mmu-miR-130b      | MIMAT0000387 |
| mmu-miR-130b*     | MIMAT0004583 |
| mmu-miR-132       | MIMAT0000144 |
| mmu-miR-132*      | MIMAT0016984 |
| mmu-miR-133a      | MIMAT0000145 |
| mmu-miR-133a*     | MIMAT0003473 |
| mmu-miR-133b      | MIMAT0000769 |
| mmu-miR-133b*     | MIMAT0017083 |
| mmu-miR-134       | MIMAT0000146 |
| mmu-miR-134*      | MIMAT0016985 |
| mmu-miR-135a      | MIMAT0000147 |
| mmu-miR-135a-1*   | MIMAT0004531 |
| mmu-miR-135a-2*   | MIMAT0017064 |
| mmu-miR-135b      | MIMAT0000612 |
| mmu-miR-135b*     | MIMAT0017044 |
| mmu-miR-136       | MIMAT0000148 |
| mmu-miR-136*      | MIMAT0004532 |
| mmu-miR-137       | MIMAT0000149 |
| mmu-miR-137*      | MIMAT0016986 |
| mmu-miR-138       | MIMAT0000150 |
| mmu-miR-138-1*    | MIMAT0004668 |
| mmu-miR-138-2*    | MIMAT0016987 |
| mmu-miR-139-5p    | MIMAT0000656 |
| mmu-miR-140       | MIMAT0000151 |
| mmu-miR-140*      | MIMAT0000152 |
| mmu-miR-141       | MIMAT0000153 |
| mmu-miR-141*      | MIMAT0004533 |

|                 |              |
|-----------------|--------------|
| mmu-miR-142-3p  | MIMAT0000155 |
| mmu-miR-142-5p  | MIMAT0000154 |
| mmu-miR-143     | MIMAT0000247 |
| mmu-miR-143*    | MIMAT0017006 |
| mmu-miR-144     | MIMAT0000156 |
| mmu-miR-144*    | MIMAT0016988 |
| mmu-miR-145     | MIMAT0000157 |
| mmu-miR-145*    | MIMAT0004534 |
| mmu-miR-146a    | MIMAT0000158 |
| mmu-miR-146a*   | MIMAT0016989 |
| mmu-miR-146b    | MIMAT0003475 |
| mmu-miR-146b*   | MIMAT0004826 |
| mmu-miR-147     | MIMAT0004857 |
| mmu-miR-148a    | MIMAT0000516 |
| mmu-miR-148a*   | MIMAT0004617 |
| mmu-miR-148b    | MIMAT0000580 |
| mmu-miR-148b*   | MIMAT0017036 |
| mmu-miR-149     | MIMAT0000159 |
| mmu-miR-149*    | MIMAT0016990 |
| mmu-miR-150     | MIMAT0000160 |
| mmu-miR-150*    | MIMAT0004535 |
| mmu-miR-151-3p  | MIMAT0000161 |
| mmu-miR-151-5p  | MIMAT0004536 |
| mmu-miR-152     | MIMAT0000162 |
| mmu-miR-152*    | MIMAT0016991 |
| mmu-miR-153     | MIMAT0000163 |
| mmu-miR-154     | MIMAT0000164 |
| mmu-miR-154*    | MIMAT0004537 |
| mmu-miR-155     | MIMAT0000165 |
| mmu-miR-15a     | MIMAT0000526 |
| mmu-miR-15a*    | MIMAT0004624 |
| mmu-miR-15b     | MIMAT0000124 |
| mmu-miR-15b*    | MIMAT0004521 |
| mmu-miR-16      | MIMAT0000527 |
| mmu-miR-16-1*   | MIMAT0004625 |
| mmu-miR-17      | MIMAT0000649 |
| mmu-miR-17*     | MIMAT0000650 |
| mmu-miR-181a    | MIMAT0000210 |
| mmu-miR-181a-1* | MIMAT0000660 |
| mmu-miR-181a-2* | MIMAT0005443 |
| mmu-miR-181b    | MIMAT0000673 |
| mmu-miR-181c    | MIMAT0000674 |
| mmu-miR-181c*   | MIMAT0017068 |
| mmu-miR-181d    | MIMAT0004324 |
| mmu-miR-181d*   | MIMAT0017264 |
| mmu-miR-182     | MIMAT0000211 |
| mmu-miR-182*    | MIMAT0016995 |
| mmu-miR-183     | MIMAT0000212 |
| mmu-miR-183*    | MIMAT0004539 |
| mmu-miR-1839-3p | MIMAT0009457 |
| mmu-miR-1839-5p | MIMAT0009456 |
| mmu-miR-184     | MIMAT0000213 |
| mmu-miR-185     | MIMAT0000214 |
| mmu-miR-185*    | MIMAT0016996 |
| mmu-miR-186     | MIMAT0000215 |
| mmu-miR-186*    | MIMAT0004540 |

|                 |              |
|-----------------|--------------|
| mmu-miR-187     | MIMAT0000216 |
| mmu-miR-188-3p  | MIMAT0004541 |
| mmu-miR-188-5p  | MIMAT0000217 |
| mmu-miR-1892    | MIMAT0007871 |
| mmu-miR-1893    | MIMAT0007879 |
| mmu-miR-1894-3p | MIMAT0007878 |
| mmu-miR-1894-5p | MIMAT0007877 |
| mmu-miR-1895    | MIMAT0007867 |
| mmu-miR-1896    | MIMAT0007873 |
| mmu-miR-1897-3p | MIMAT0007865 |
| mmu-miR-1897-5p | MIMAT0007864 |
| mmu-miR-1898    | MIMAT0007875 |
| mmu-miR-1899    | MIMAT0007869 |
| mmu-miR-18a     | MIMAT0000528 |
| mmu-miR-18a*    | MIMAT0004626 |
| mmu-miR-18b     | MIMAT0004858 |
| mmu-miR-190     | MIMAT0000220 |
| mmu-miR-1900    | MIMAT0007870 |
| mmu-miR-1901    | MIMAT0007880 |
| mmu-miR-1902    | MIMAT0007863 |
| mmu-miR-1903    | MIMAT0007868 |
| mmu-miR-1904    | MIMAT0007874 |
| mmu-miR-1905    | MIMAT0007866 |
| mmu-miR-1906    | MIMAT0007872 |
| mmu-miR-1907    | MIMAT0007876 |
| mmu-miR-190b    | MIMAT0004852 |
| mmu-miR-191     | MIMAT0000221 |
| mmu-miR-191*    | MIMAT0004542 |
| mmu-miR-192     | MIMAT0000517 |
| mmu-miR-192*    | MIMAT0017012 |
| mmu-miR-193     | MIMAT0000223 |
| mmu-miR-193*    | MIMAT0004544 |
| mmu-miR-1937a   | MIMAT0009401 |
| mmu-miR-1937b   | MIMAT0009414 |
| mmu-miR-1937c   | MIMAT0009429 |
| mmu-miR-193b    | MIMAT0004859 |
| mmu-miR-193b*   | MIMAT0017271 |
| mmu-miR-194     | MIMAT0000224 |
| mmu-miR-194-2*  | MIMAT0017073 |
| mmu-miR-195     | MIMAT0000225 |
| mmu-miR-195*    | MIMAT0017000 |
| mmu-miR-1959    | MIMAT0009432 |
| mmu-miR-196a    | MIMAT0000518 |
| mmu-miR-196a-1* | MIMAT0017013 |
| mmu-miR-196a-2* | MIMAT0004618 |
| mmu-miR-196b    | MIMAT0001081 |
| mmu-miR-196b*   | MIMAT0017170 |
| mmu-miR-1982*   | MIMAT0009459 |
| mmu-miR-1982.1  | MIMAT0009460 |
| mmu-miR-1982.2  | MIMAT0009461 |
| mmu-miR-199a-3p | MIMAT0000230 |
| mmu-miR-199a-5p | MIMAT0000229 |
| mmu-miR-199b    | MIMAT0004667 |
| mmu-miR-199b*   | MIMAT0000672 |
| mmu-miR-19a     | MIMAT0000651 |
| mmu-miR-19a*    | MIMAT0004660 |

|                 |              |
|-----------------|--------------|
| mmu-miR-19b     | MIMAT0000513 |
| mmu-miR-19b-1*  | MIMAT0017065 |
| mmu-miR-19b-2*  | MIMAT0017010 |
| mmu-miR-200a    | MIMAT0000519 |
| mmu-miR-200a*   | MIMAT0004619 |
| mmu-miR-200b    | MIMAT0000233 |
| mmu-miR-200b*   | MIMAT0004545 |
| mmu-miR-200c    | MIMAT0000657 |
| mmu-miR-200c*   | MIMAT0004663 |
| mmu-miR-201     | MIMAT0000234 |
| mmu-miR-202-3p  | MIMAT0000235 |
| mmu-miR-202-5p  | MIMAT0004546 |
| mmu-miR-203     | MIMAT0000236 |
| mmu-miR-203*    | MIMAT0004547 |
| mmu-miR-204     | MIMAT0000237 |
| mmu-miR-205     | MIMAT0000238 |
| mmu-miR-206     | MIMAT0000239 |
| mmu-miR-207     | MIMAT0000240 |
| mmu-miR-208a-3p | MIMAT0000520 |
| mmu-miR-208a-5p | MIMAT0017014 |
| mmu-miR-208b    | MIMAT0004939 |
| mmu-miR-20a     | MIMAT0000529 |
| mmu-miR-20a*    | MIMAT0004627 |
| mmu-miR-20b     | MIMAT0003187 |
| mmu-miR-20b*    | MIMAT0004788 |
| mmu-miR-21      | MIMAT0000530 |
| mmu-miR-21*     | MIMAT0004628 |
| mmu-miR-210     | MIMAT0000658 |
| mmu-miR-211     | MIMAT0000668 |
| mmu-miR-212-3p  | MIMAT0000659 |
| mmu-miR-212-5p  | MIMAT0017053 |
| mmu-miR-214     | MIMAT0000661 |
| mmu-miR-214*    | MIMAT0004664 |
| mmu-miR-215     | MIMAT0000904 |
| mmu-miR-216a    | MIMAT0000662 |
| mmu-miR-216b    | MIMAT0003729 |
| mmu-miR-217     | MIMAT0000679 |
| mmu-miR-218     | MIMAT0000663 |
| mmu-miR-218-1*  | MIMAT0004665 |
| mmu-miR-218-2*  | MIMAT0005444 |
| mmu-miR-219-3p  | MIMAT0017074 |
| mmu-miR-219-5p  | MIMAT0000664 |
| mmu-miR-22      | MIMAT0000531 |
| mmu-miR-22*     | MIMAT0004629 |
| mmu-miR-221     | MIMAT0000669 |
| mmu-miR-221*    | MIMAT0017060 |
| mmu-miR-222     | MIMAT0000670 |
| mmu-miR-222*    | MIMAT0017061 |
| mmu-miR-223     | MIMAT0000665 |
| mmu-miR-223*    | MIMAT0017056 |
| mmu-miR-224     | MIMAT0000671 |
| mmu-miR-23a     | MIMAT0000532 |
| mmu-miR-23a*    | MIMAT0017019 |
| mmu-miR-23b     | MIMAT0000125 |
| mmu-miR-23b*    | MIMAT0016980 |
| mmu-miR-24      | MIMAT0000219 |

|                 |              |
|-----------------|--------------|
| mmu-miR-24-1*   | MIMAT0000218 |
| mmu-miR-24-2*   | MIMAT0005440 |
| mmu-miR-25      | MIMAT0000652 |
| mmu-miR-25*     | MIMAT0017049 |
| mmu-miR-26a     | MIMAT0000533 |
| mmu-miR-26a-1*  | MIMAT0017020 |
| mmu-miR-26b     | MIMAT0000534 |
| mmu-miR-26b*    | MIMAT0004630 |
| mmu-miR-27a     | MIMAT0000537 |
| mmu-miR-27a*    | MIMAT0004633 |
| mmu-miR-27b     | MIMAT0000126 |
| mmu-miR-27b*    | MIMAT0004522 |
| mmu-miR-28      | MIMAT0000653 |
| mmu-miR-28*     | MIMAT0004661 |
| mmu-miR-290-3p  | MIMAT0004572 |
| mmu-miR-290-5p  | MIMAT0000366 |
| mmu-miR-291a-3p | MIMAT0000368 |
| mmu-miR-291a-5p | MIMAT0000367 |
| mmu-miR-291b-3p | MIMAT0003190 |
| mmu-miR-291b-5p | MIMAT0003189 |
| mmu-miR-292-3p  | MIMAT0000370 |
| mmu-miR-292-5p  | MIMAT0000369 |
| mmu-miR-293     | MIMAT0000371 |
| mmu-miR-293*    | MIMAT0004573 |
| mmu-miR-294     | MIMAT0000372 |
| mmu-miR-294*    | MIMAT0004574 |
| mmu-miR-295     | MIMAT0000373 |
| mmu-miR-295*    | MIMAT0004575 |
| mmu-miR-296-3p  | MIMAT0004576 |
| mmu-miR-296-5p  | MIMAT0000374 |
| mmu-miR-297a    | MIMAT0000375 |
| mmu-miR-297a*   | MIMAT0004864 |
| mmu-miR-297b-3p | MIMAT0004827 |
| mmu-miR-297b-5p | MIMAT0003480 |
| mmu-miR-297c    | MIMAT0004865 |
| mmu-miR-297c*   | MIMAT0004866 |
| mmu-miR-298     | MIMAT0000376 |
| mmu-miR-299     | MIMAT0004577 |
| mmu-miR-299*    | MIMAT0000377 |
| mmu-miR-29a     | MIMAT0000535 |
| mmu-miR-29a*    | MIMAT0004631 |
| mmu-miR-29b     | MIMAT0000127 |
| mmu-miR-29b-1*  | MIMAT0004523 |
| mmu-miR-29b-2*  | MIMAT0017063 |
| mmu-miR-29c     | MIMAT0000536 |
| mmu-miR-29c*    | MIMAT0004632 |
| mmu-miR-300     | MIMAT0000378 |
| mmu-miR-300*    | MIMAT0004578 |
| mmu-miR-301a    | MIMAT0000379 |
| mmu-miR-301a*   | MIMAT0017008 |
| mmu-miR-301b    | MIMAT0004186 |
| mmu-miR-302a    | MIMAT0000380 |
| mmu-miR-302a*   | MIMAT0004579 |
| mmu-miR-302b    | MIMAT0003374 |
| mmu-miR-302b*   | MIMAT0003373 |
| mmu-miR-302c    | MIMAT0003376 |

|                   |              |
|-------------------|--------------|
| mmu-miR-302c*     | MIMAT0003375 |
| mmu-miR-302d      | MIMAT0003377 |
| mmu-miR-302d*     | MIMAT0017225 |
| mmu-miR-3059      | MIMAT0014811 |
| mmu-miR-3059*     | MIMAT0014812 |
| mmu-miR-3072      | MIMAT0014853 |
| mmu-miR-3072*     | MIMAT0014852 |
| mmu-miR-3074-1-3p | MIMAT0014857 |
| mmu-miR-3085-3p   | MIMAT0014879 |
| mmu-miR-30a       | MIMAT0000128 |
| mmu-miR-30a*      | MIMAT0000129 |
| mmu-miR-30b       | MIMAT0000130 |
| mmu-miR-30b*      | MIMAT0004524 |
| mmu-miR-30c       | MIMAT0000514 |
| mmu-miR-30c-1*    | MIMAT0004616 |
| mmu-miR-30c-2*    | MIMAT0005438 |
| mmu-miR-30d       | MIMAT0000515 |
| mmu-miR-30d*      | MIMAT0017011 |
| mmu-miR-30e       | MIMAT0000248 |
| mmu-miR-30e*      | MIMAT0000249 |
| mmu-miR-31        | MIMAT0000538 |
| mmu-miR-31*       | MIMAT0004634 |
| mmu-miR-3107      | MIMAT0014943 |
| mmu-miR-32        | MIMAT0000654 |
| mmu-miR-32*       | MIMAT0017050 |
| mmu-miR-320       | MIMAT0000666 |
| mmu-miR-320*      | MIMAT0017057 |
| mmu-miR-322       | MIMAT0000548 |
| mmu-miR-322*      | MIMAT0000549 |
| mmu-miR-323-3p    | MIMAT0000551 |
| mmu-miR-323-5p    | MIMAT0004638 |
| mmu-miR-324-3p    | MIMAT0000556 |
| mmu-miR-324-5p    | MIMAT0000555 |
| mmu-miR-325       | MIMAT0004640 |
| mmu-miR-325*      | MIMAT0000558 |
| mmu-miR-326       | MIMAT0000559 |
| mmu-miR-327       | MIMAT0004867 |
| mmu-miR-328       | MIMAT0000565 |
| mmu-miR-329       | MIMAT0000567 |
| mmu-miR-33        | MIMAT0000667 |
| mmu-miR-33*       | MIMAT0004666 |
| mmu-miR-330       | MIMAT0004642 |
| mmu-miR-330*      | MIMAT0000569 |
| mmu-miR-331-3p    | MIMAT0000571 |
| mmu-miR-331-5p    | MIMAT0004643 |
| mmu-miR-335-3p    | MIMAT0004704 |
| mmu-miR-335-5p    | MIMAT0000766 |
| mmu-miR-337-3p    | MIMAT0000578 |
| mmu-miR-337-5p    | MIMAT0004644 |
| mmu-miR-338-3p    | MIMAT0000582 |
| mmu-miR-338-5p    | MIMAT0004647 |
| mmu-miR-339-3p    | MIMAT0004649 |
| mmu-miR-339-5p    | MIMAT0000584 |
| mmu-miR-340-3p    | MIMAT0000586 |
| mmu-miR-340-5p    | MIMAT0004651 |
| mmu-miR-341       | MIMAT0000588 |



|                |              |
|----------------|--------------|
| mmu-miR-342-3p | MIMAT0000590 |
| mmu-miR-342-5p | MIMAT0004653 |
| mmu-miR-343    | MIMAT0004868 |
| mmu-miR-344    | MIMAT0000593 |
| mmu-miR-345-3p | MIMAT0004656 |
| mmu-miR-345-5p | MIMAT0000595 |
| mmu-miR-346    | MIMAT0000597 |
| mmu-miR-34a    | MIMAT0000542 |
| mmu-miR-34a*   | MIMAT0017022 |
| mmu-miR-34b-3p | MIMAT0004581 |
| mmu-miR-34b-5p | MIMAT0000382 |
| mmu-miR-34c    | MIMAT0000381 |
| mmu-miR-34c*   | MIMAT0004580 |
| mmu-miR-350    | MIMAT0000605 |
| mmu-miR-351    | MIMAT0000609 |
| mmu-miR-361    | MIMAT0000704 |
| mmu-miR-361*   | MIMAT0017075 |
| mmu-miR-362-3p | MIMAT0004684 |
| mmu-miR-362-5p | MIMAT0000706 |
| mmu-miR-363-3p | MIMAT0000708 |
| mmu-miR-363-5p | MIMAT0017076 |
| mmu-miR-365    | MIMAT0000711 |
| mmu-miR-365-1* | MIMAT0017077 |
| mmu-miR-367    | MIMAT0003181 |
| mmu-miR-369-3p | MIMAT0003186 |
| mmu-miR-369-5p | MIMAT0003185 |
| mmu-miR-370    | MIMAT0001095 |
| mmu-miR-374    | MIMAT0003727 |
| mmu-miR-374*   | MIMAT0003728 |
| mmu-miR-375    | MIMAT0000739 |
| mmu-miR-376a   | MIMAT0000740 |
| mmu-miR-376a*  | MIMAT0003387 |
| mmu-miR-376b   | MIMAT0001092 |
| mmu-miR-376b*  | MIMAT0003388 |
| mmu-miR-376c   | MIMAT0003183 |
| mmu-miR-376c*  | MIMAT0005295 |
| mmu-miR-377    | MIMAT0000741 |
| mmu-miR-377*   | MIMAT0017079 |
| mmu-miR-378    | MIMAT0003151 |
| mmu-miR-378*   | MIMAT0000742 |
| mmu-miR-379    | MIMAT0000743 |
| mmu-miR-379*   | MIMAT0017080 |
| mmu-miR-380-3p | MIMAT0000745 |
| mmu-miR-380-5p | MIMAT0000744 |
| mmu-miR-381    | MIMAT0000746 |
| mmu-miR-381*   | MIMAT0017081 |
| mmu-miR-382    | MIMAT0000747 |
| mmu-miR-382*   | MIMAT0004691 |
| mmu-miR-383    | MIMAT0000748 |
| mmu-miR-384-3p | MIMAT0001076 |
| mmu-miR-384-5p | MIMAT0004745 |
| mmu-miR-409-3p | MIMAT0001090 |
| mmu-miR-409-5p | MIMAT0004746 |
| mmu-miR-410    | MIMAT0001091 |
| mmu-miR-411    | MIMAT0004747 |
| mmu-miR-411*   | MIMAT0001093 |

|                 |              |
|-----------------|--------------|
| mmu-miR-412-3p  | MIMAT0001094 |
| mmu-miR-412-5p  | MIMAT0017173 |
| mmu-miR-421     | MIMAT0004869 |
| mmu-miR-421*    | MIMAT0017273 |
| mmu-miR-423-3p  | MIMAT0003454 |
| mmu-miR-423-5p  | MIMAT0004825 |
| mmu-miR-425     | MIMAT0004750 |
| mmu-miR-425*    | MIMAT0001342 |
| mmu-miR-429     | MIMAT0001537 |
| mmu-miR-431     | MIMAT0001418 |
| mmu-miR-431*    | MIMAT0004753 |
| mmu-miR-432     | MIMAT0012771 |
| mmu-miR-433     | MIMAT0001420 |
| mmu-miR-433*    | MIMAT0001419 |
| mmu-miR-434-3p  | MIMAT0001422 |
| mmu-miR-434-5p  | MIMAT0001421 |
| mmu-miR-448-3p  | MIMAT0001533 |
| mmu-miR-448-5p  | MIMAT0017176 |
| mmu-miR-449a    | MIMAT0001542 |
| mmu-miR-449b    | MIMAT0005447 |
| mmu-miR-449c    | MIMAT0003460 |
| mmu-miR-450a    | MIMAT0001546 |
| mmu-miR-450a-2* | MIMAT0004789 |
| mmu-miR-450b-3p | MIMAT0003512 |
| mmu-miR-450b-5p | MIMAT0003511 |
| mmu-miR-451     | MIMAT0001632 |
| mmu-miR-452-3p  | MIMAT0017194 |
| mmu-miR-452-5p  | MIMAT0001637 |
| mmu-miR-453     | MIMAT0004870 |
| mmu-miR-455     | MIMAT0003742 |
| mmu-miR-455*    | MIMAT0003485 |
| mmu-miR-463     | MIMAT0004758 |
| mmu-miR-463*    | MIMAT0002104 |
| mmu-miR-464     | MIMAT0002105 |
| mmu-miR-465a-3p | MIMAT0004217 |
| mmu-miR-465a-5p | MIMAT0002106 |
| mmu-miR-465b-3p | MIMAT0004872 |
| mmu-miR-465b-5p | MIMAT0004871 |
| mmu-miR-465c-3p | MIMAT0004874 |
| mmu-miR-465c-5p | MIMAT0004873 |
| mmu-miR-466a-3p | MIMAT0002107 |
| mmu-miR-466a-5p | MIMAT0004759 |
| mmu-miR-466b-3p | MIMAT0004876 |
| mmu-miR-466c-3p | MIMAT0004878 |
| mmu-miR-466c-5p | MIMAT0004877 |
| mmu-miR-466d-3p | MIMAT0004931 |
| mmu-miR-466d-5p | MIMAT0004930 |
| mmu-miR-466e-3p | MIMAT0004880 |
| mmu-miR-466e-5p | MIMAT0004879 |
| mmu-miR-466f    | MIMAT0005844 |
| mmu-miR-466f-3p | MIMAT0004882 |
| mmu-miR-466f-5p | MIMAT0004881 |
| mmu-miR-466g    | MIMAT0004883 |
| mmu-miR-466h-3p | MIMAT0017274 |
| mmu-miR-466h-5p | MIMAT0004884 |
| mmu-miR-466i-3p | MIMAT0005834 |

|                 |              |
|-----------------|--------------|
| mmu-miR-466i-5p | MIMAT0017325 |
| mmu-miR-466j    | MIMAT0005848 |
| mmu-miR-466k    | MIMAT0005845 |
| mmu-miR-466l-3p | MIMAT0005830 |
| mmu-miR-466l-5p | MIMAT0017322 |
| mmu-miR-466m-5p | MIMAT0014882 |
| mmu-miR-466n-5p | MIMAT0014893 |
| mmu-miR-466p-3p | MIMAT0014892 |
| mmu-miR-466p-5p | MIMAT0014891 |
| mmu-miR-467a    | MIMAT0003409 |
| mmu-miR-467a*   | MIMAT0002108 |
| mmu-miR-467b    | MIMAT0005448 |
| mmu-miR-467b*   | MIMAT0003478 |
| mmu-miR-467c    | MIMAT0004885 |
| mmu-miR-467c*   | MIMAT0017275 |
| mmu-miR-467d    | MIMAT0004886 |
| mmu-miR-467d*   | MIMAT0004887 |
| mmu-miR-467e    | MIMAT0005293 |
| mmu-miR-467e*   | MIMAT0005294 |
| mmu-miR-467f    | MIMAT0005846 |
| mmu-miR-467g    | MIMAT0005854 |
| mmu-miR-467h    | MIMAT0005855 |
| mmu-miR-468     | MIMAT0002109 |
| mmu-miR-469     | MIMAT0002110 |
| mmu-miR-470     | MIMAT0002111 |
| mmu-miR-470*    | MIMAT0004760 |
| mmu-miR-471-3p  | MIMAT0017195 |
| mmu-miR-471-5p  | MIMAT0002112 |
| mmu-miR-483     | MIMAT0004782 |
| mmu-miR-483*    | MIMAT0003120 |
| mmu-miR-484     | MIMAT0003127 |
| mmu-miR-485     | MIMAT0003128 |
| mmu-miR-485*    | MIMAT0003129 |
| mmu-miR-486     | MIMAT0003130 |
| mmu-miR-487b    | MIMAT0003184 |
| mmu-miR-488     | MIMAT0003450 |
| mmu-miR-488*    | MIMAT0003449 |
| mmu-miR-489     | MIMAT0003112 |
| mmu-miR-490-3p  | MIMAT0003780 |
| mmu-miR-490-5p  | MIMAT0017261 |
| mmu-miR-491     | MIMAT0003486 |
| mmu-miR-491*    | MIMAT0017255 |
| mmu-miR-493     | MIMAT0004888 |
| mmu-miR-494     | MIMAT0003182 |
| mmu-miR-495     | MIMAT0003456 |
| mmu-miR-496     | MIMAT0003738 |
| mmu-miR-497     | MIMAT0003453 |
| mmu-miR-497*    | MIMAT0017247 |
| mmu-miR-499     | MIMAT0003482 |
| mmu-miR-499*    | MIMAT0017254 |
| mmu-miR-500     | MIMAT0003507 |
| mmu-miR-500*    | MIMAT0017258 |
| mmu-miR-501-3p  | MIMAT0003509 |
| mmu-miR-501-5p  | MIMAT0003508 |
| mmu-miR-503     | MIMAT0003188 |
| mmu-miR-503*    | MIMAT0004790 |

|                   |              |
|-------------------|--------------|
| mmu-miR-504       | MIMAT0004889 |
| mmu-miR-505-3p    | MIMAT0003513 |
| mmu-miR-505-5p    | MIMAT0017259 |
| mmu-miR-509-3p    | MIMAT0004891 |
| mmu-miR-509-5p    | MIMAT0004890 |
| mmu-miR-511-3p    | MIMAT0017281 |
| mmu-miR-511-5p    | MIMAT0004940 |
| mmu-miR-532-3p    | MIMAT0004781 |
| mmu-miR-532-5p    | MIMAT0002889 |
| mmu-miR-539-3p    | MIMAT0017208 |
| mmu-miR-539-5p    | MIMAT0003169 |
| mmu-miR-540-3p    | MIMAT0003167 |
| mmu-miR-540-5p    | MIMAT0004786 |
| mmu-miR-541       | MIMAT0003170 |
| mmu-miR-542-3p    | MIMAT0003172 |
| mmu-miR-542-5p    | MIMAT0003171 |
| mmu-miR-543       | MIMAT0003168 |
| mmu-miR-544-3p    | MIMAT0004941 |
| mmu-miR-544-5p    | MIMAT0017282 |
| mmu-miR-546       | MIMAT0003166 |
| mmu-miR-547       | MIMAT0003173 |
| mmu-miR-551b      | MIMAT0003890 |
| mmu-miR-568       | MIMAT0004892 |
| mmu-miR-574-3p    | MIMAT0004894 |
| mmu-miR-574-5p    | MIMAT0004893 |
| mmu-miR-582-3p    | MIMAT0005292 |
| mmu-miR-582-5p    | MIMAT0005291 |
| mmu-miR-590-3p    | MIMAT0004896 |
| mmu-miR-590-5p    | MIMAT0004895 |
| mmu-miR-592       | MIMAT0003730 |
| mmu-miR-598       | MIMAT0004942 |
| mmu-miR-599       | MIMAT0012772 |
| mmu-miR-615-3p    | MIMAT0003783 |
| mmu-miR-615-5p    | MIMAT0004837 |
| mmu-miR-652       | MIMAT0003711 |
| mmu-miR-653       | MIMAT0004943 |
| mmu-miR-654-3p    | MIMAT0004898 |
| mmu-miR-654-5p    | MIMAT0004897 |
| mmu-miR-664       | MIMAT0012774 |
| mmu-miR-665       | MIMAT0003733 |
| mmu-miR-666-3p    | MIMAT0004823 |
| mmu-miR-666-5p    | MIMAT0003737 |
| mmu-miR-667       | MIMAT0003734 |
| mmu-miR-668       | MIMAT0003732 |
| mmu-miR-669a-3-3p | MIMAT0017251 |
| mmu-miR-669a-3p   | MIMAT0017243 |
| mmu-miR-669a-5p   | MIMAT0003477 |
| mmu-miR-669b      | MIMAT0003476 |
| mmu-miR-669c      | MIMAT0003479 |
| mmu-miR-669d      | MIMAT0005833 |
| mmu-miR-669e      | MIMAT0005853 |
| mmu-miR-669f-3p   | MIMAT0005839 |
| mmu-miR-669g      | MIMAT0005832 |
| mmu-miR-669h-3p   | MIMAT0005842 |
| mmu-miR-669h-5p   | MIMAT0005841 |
| mmu-miR-669i      | MIMAT0005840 |

|                 |              |
|-----------------|--------------|
| mmu-miR-669j    | MIMAT0005838 |
| mmu-miR-669k    | MIMAT0005831 |
| mmu-miR-669l    | MIMAT0009418 |
| mmu-miR-669m-3p | MIMAT0009419 |
| mmu-miR-669m-5p | MIMAT0017346 |
| mmu-miR-669o-3p | MIMAT0017347 |
| mmu-miR-669o-5p | MIMAT0009421 |
| mmu-miR-669p    | MIMAT0014889 |
| mmu-miR-670     | MIMAT0003736 |
| mmu-miR-671-3p  | MIMAT0004821 |
| mmu-miR-671-5p  | MIMAT0003731 |
| mmu-miR-672     | MIMAT0003735 |
| mmu-miR-673-3p  | MIMAT0004824 |
| mmu-miR-673-5p  | MIMAT0003739 |
| mmu-miR-674     | MIMAT0003740 |
| mmu-miR-674*    | MIMAT0003741 |
| mmu-miR-675-3p  | MIMAT0003726 |
| mmu-miR-675-5p  | MIMAT0003725 |
| mmu-miR-676     | MIMAT0003782 |
| mmu-miR-676*    | MIMAT0003781 |
| mmu-miR-677     | MIMAT0003451 |
| mmu-miR-678     | MIMAT0003452 |
| mmu-miR-679-5p  | MIMAT0003455 |
| mmu-miR-680     | MIMAT0003457 |
| mmu-miR-681     | MIMAT0003458 |
| mmu-miR-682     | MIMAT0003459 |
| mmu-miR-683     | MIMAT0003461 |
| mmu-miR-684     | MIMAT0003462 |
| mmu-miR-686     | MIMAT0003464 |
| mmu-miR-687     | MIMAT0003466 |
| mmu-miR-688     | MIMAT0003467 |
| mmu-miR-690     | MIMAT0003469 |
| mmu-miR-691     | MIMAT0003470 |
| mmu-miR-692     | MIMAT0003471 |
| mmu-miR-693-3p  | MIMAT0004189 |
| mmu-miR-693-5p  | MIMAT0003472 |
| mmu-miR-694     | MIMAT0003474 |
| mmu-miR-695     | MIMAT0003481 |
| mmu-miR-696     | MIMAT0003483 |
| mmu-miR-697     | MIMAT0003487 |
| mmu-miR-698     | MIMAT0003488 |
| mmu-miR-700     | MIMAT0003490 |
| mmu-miR-701     | MIMAT0003491 |
| mmu-miR-702     | MIMAT0003492 |
| mmu-miR-703     | MIMAT0003493 |
| mmu-miR-704     | MIMAT0003494 |
| mmu-miR-705     | MIMAT0003495 |
| mmu-miR-706     | MIMAT0003496 |
| mmu-miR-707     | MIMAT0003497 |
| mmu-miR-708     | MIMAT0004828 |
| mmu-miR-708*    | MIMAT0003498 |
| mmu-miR-709     | MIMAT0003499 |
| mmu-miR-710     | MIMAT0003500 |
| mmu-miR-711     | MIMAT0003501 |
| mmu-miR-712     | MIMAT0003502 |
| mmu-miR-712*    | MIMAT0003743 |

|                 |              |
|-----------------|--------------|
| mmu-miR-713     | MIMAT0003504 |
| mmu-miR-714     | MIMAT0003505 |
| mmu-miR-715     | MIMAT0003506 |
| mmu-miR-717     | MIMAT0003510 |
| mmu-miR-718     | MIMAT0003514 |
| mmu-miR-719     | MIMAT0003465 |
| mmu-miR-720     | MIMAT0003484 |
| mmu-miR-721     | MIMAT0003515 |
| mmu-miR-741     | MIMAT0004236 |
| mmu-miR-742     | MIMAT0004237 |
| mmu-miR-742*    | MIMAT0004838 |
| mmu-miR-743a    | MIMAT0004238 |
| mmu-miR-743b-3p | MIMAT0004840 |
| mmu-miR-743b-5p | MIMAT0004839 |
| mmu-miR-744     | MIMAT0004187 |
| mmu-miR-744*    | MIMAT0004820 |
| mmu-miR-758     | MIMAT0003889 |
| mmu-miR-759     | MIMAT0003897 |
| mmu-miR-760-3p  | MIMAT0003898 |
| mmu-miR-760-5p  | MIMAT0017245 |
| mmu-miR-761     | MIMAT0003893 |
| mmu-miR-762     | MIMAT0003892 |
| mmu-miR-763     | MIMAT0003896 |
| mmu-miR-764-3p  | MIMAT0003895 |
| mmu-miR-764-5p  | MIMAT0003894 |
| mmu-miR-767     | MIMAT0012773 |
| mmu-miR-770-3p  | MIMAT0003891 |
| mmu-miR-770-5p  | MIMAT0004822 |
| mmu-miR-7a      | MIMAT0000677 |
| mmu-miR-7a-1*   | MIMAT0004670 |
| mmu-miR-7b      | MIMAT0000678 |
| mmu-miR-802     | MIMAT0004188 |
| mmu-miR-804     | MIMAT0004210 |
| mmu-miR-871-3p  | MIMAT0017265 |
| mmu-miR-871-5p  | MIMAT0004841 |
| mmu-miR-872     | MIMAT0004934 |
| mmu-miR-872*    | MIMAT0004935 |
| mmu-miR-873     | MIMAT0004936 |
| mmu-miR-874     | MIMAT0004853 |
| mmu-miR-874*    | MIMAT0017268 |
| mmu-miR-875-3p  | MIMAT0004938 |
| mmu-miR-875-5p  | MIMAT0004937 |
| mmu-miR-876-3p  | MIMAT0004855 |
| mmu-miR-876-5p  | MIMAT0004854 |
| mmu-miR-877     | MIMAT0004861 |
| mmu-miR-877*    | MIMAT0004862 |
| mmu-miR-878-3p  | MIMAT0004933 |
| mmu-miR-878-5p  | MIMAT0004932 |
| mmu-miR-879     | MIMAT0004842 |
| mmu-miR-879*    | MIMAT0004843 |
| mmu-miR-880     | MIMAT0004844 |
| mmu-miR-881     | MIMAT0004846 |
| mmu-miR-881*    | MIMAT0004845 |
| mmu-miR-882     | MIMAT0004847 |
| mmu-miR-883a-3p | MIMAT0004849 |
| mmu-miR-883a-5p | MIMAT0004848 |

|                 |              |
|-----------------|--------------|
| mmu-miR-883b-3p | MIMAT0004851 |
| mmu-miR-883b-5p | MIMAT0004850 |
| mmu-miR-9       | MIMAT0000142 |
| mmu-miR-9*      | MIMAT0000143 |
| mmu-miR-92a     | MIMAT0000539 |
| mmu-miR-92a-2*  | MIMAT0004635 |
| mmu-miR-92b     | MIMAT0004899 |
| mmu-miR-93      | MIMAT0000540 |
| mmu-miR-93*     | MIMAT0004636 |
| mmu-miR-96      | MIMAT0000541 |
| mmu-miR-96*     | MIMAT0017021 |
| mmu-miR-98      | MIMAT0000545 |
| mmu-miR-99a     | MIMAT0000131 |
| mmu-miR-99a*    | MIMAT0016981 |
| mmu-miR-99b     | MIMAT0000132 |
| mmu-miR-99b*    | MIMAT0004525 |
